# Supplementary material for: The fate of arsenic in a river acidified by volcanic activity and an acid thermal water and sedimentation mechanism
Source: Royal Society of Chemistry journal article supplement (doi:10.1039/c4em00303a), 2014-07-07
Supplement: c4em00303a1.pdf [file c4em00303a1.pdf]

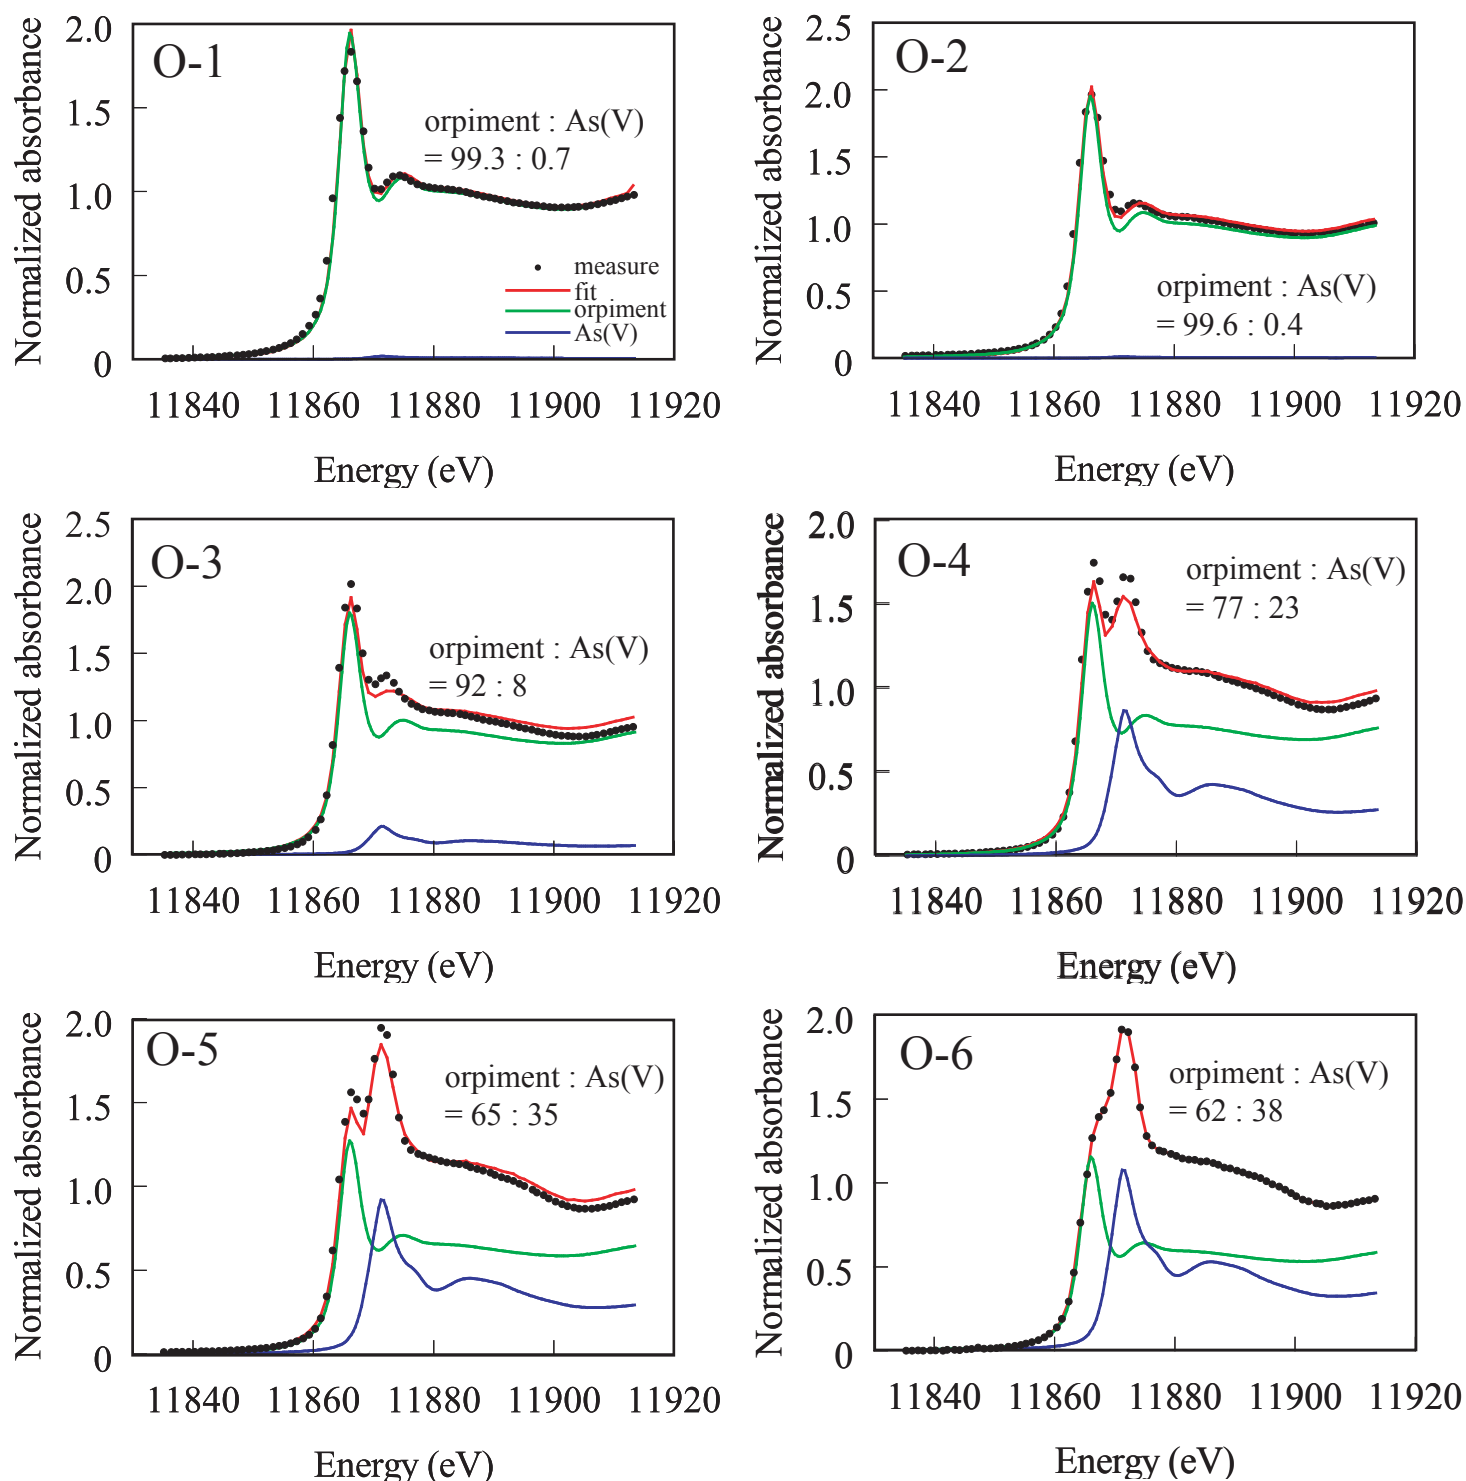

Fig: S1

Measurement results of sediment samples from the Shozu-gawa River and optimal fits based on linear combinations of the standard materials (orpiment and As(V)).
